# Supplementary figures and images for: Onto-CC: a web server for identifying Gene Ontology conceptual clusters
Source: PubMed Central journal article supplement — Nucleic Acids Res. 2008 Jun 10;36(Web Server issue):W352–7. doi: 10.1093/nar/gkn323 (PMC2447763; doi:10.1093/nar/gkn323), 2008-06-10

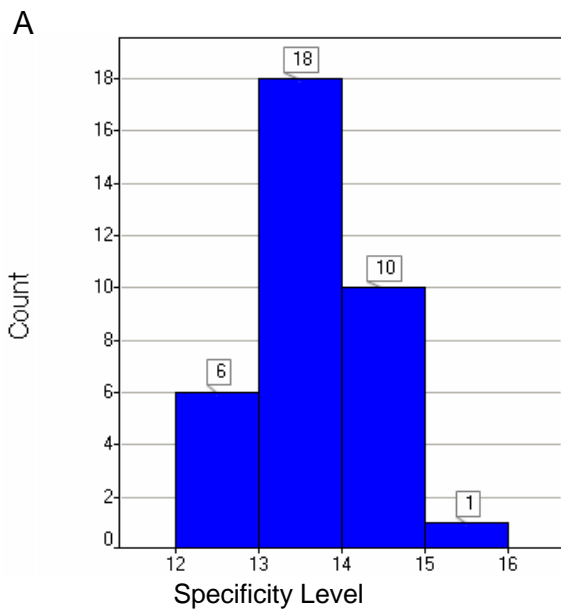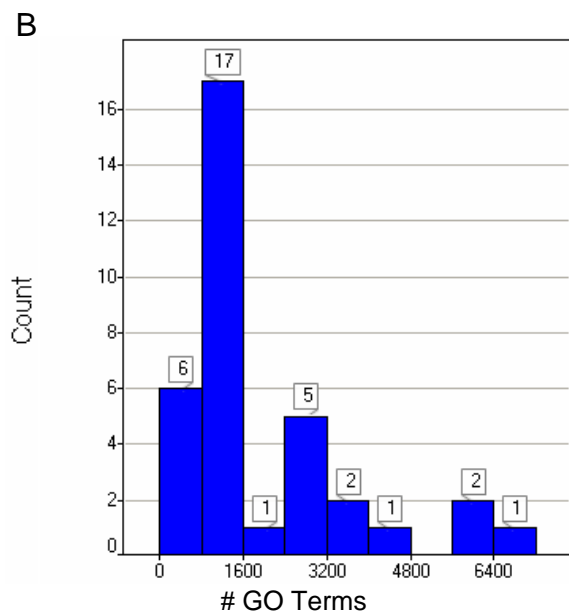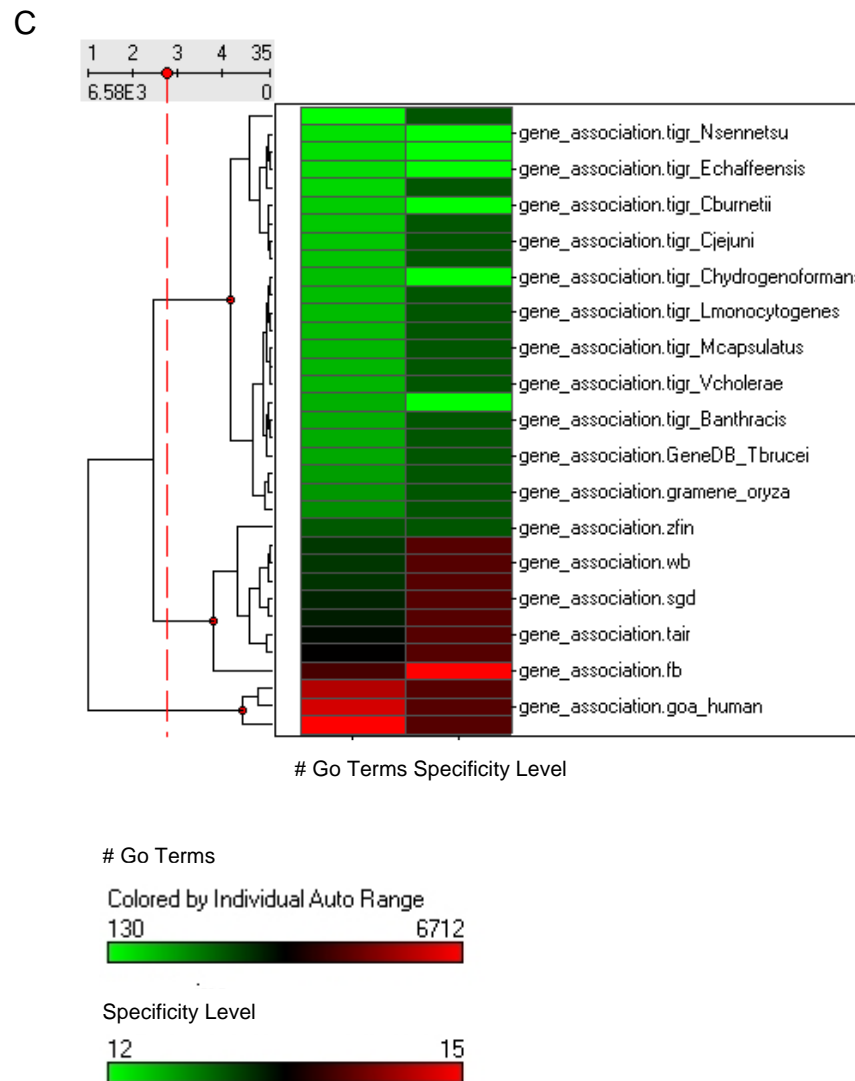

Supplement: gkn323_1.pdf [file gkn323_1.pdf]

A

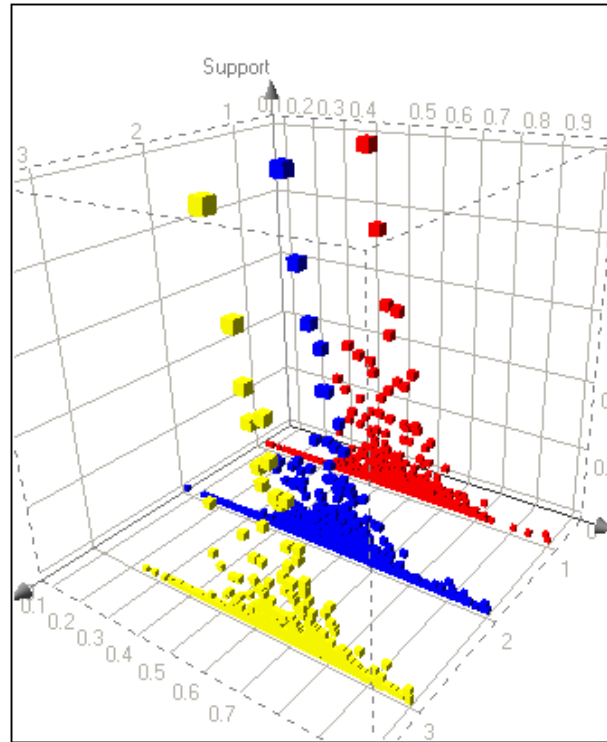

B

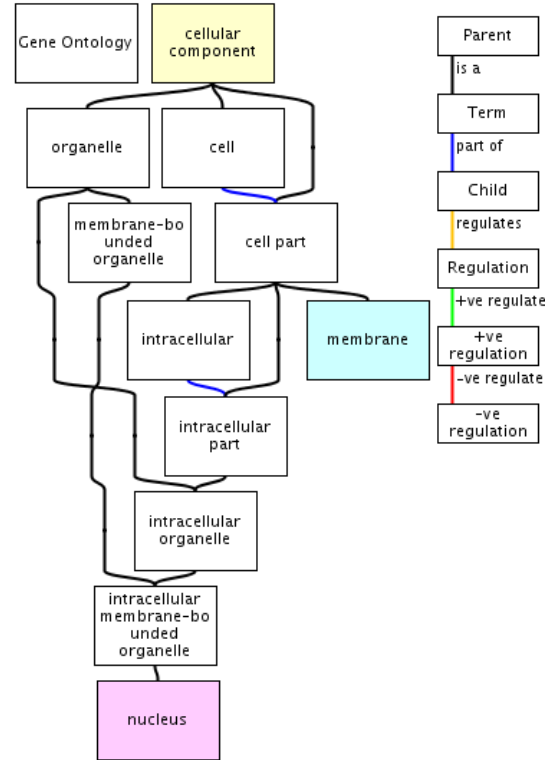

Supplement: gkn323_3.pdf [file gkn323_3.pdf]
